# Supplementary material for: PHYTOCHROME B and HISTONE DEACETYLASE 6 Control Light-Induced Chromatin Compaction in Arabidopsis thaliana
Source: PubMed Central journal article supplement (PMC2728481; doi:10.1371/journal.pgen.1000638), 2009-09-04
Supplement: pgen.1000638.s008.pdf [file pgen.1000638.s008.pdf]

**Table S4**

| AGI code  | Associated gene model | Description                                                                                                                                                                                                                                                                                                                                                                                                                                                                                                                                                                                                                                                                                                                                                                  |
|-----------|-----------------------|------------------------------------------------------------------------------------------------------------------------------------------------------------------------------------------------------------------------------------------------------------------------------------------------------------------------------------------------------------------------------------------------------------------------------------------------------------------------------------------------------------------------------------------------------------------------------------------------------------------------------------------------------------------------------------------------------------------------------------------------------------------------------|
| AT2G18790 | PHYB                  | Red/far-red photoreceptor involved in the regulation of de-etiolation. Exists in two inter-convertible forms: Pr and Pfr (active). Involved in the light-promotion of seed germination and in the shade avoidance response.                                                                                                                                                                                                                                                                                                                                                                                                                                                                                                                                                  |
| AT2G14820 |                       | phototropic-responsive NPH3 family protein; similar to phototropic-responsive NPH3 family protein [Arabidopsis thaliana] (TAIR:AT5G67440.1)                                                                                                                                                                                                                                                                                                                                                                                                                                                                                                                                                                                                                                  |
| AT2G19230 |                       | leucine-rich repeat protein kinase. putative; similar to FRK1 (FLG22-INDUCED RECEPTOR-LIKE KINASE 1). kinase [Arabidopsis thaliana] (TAIR:AT2G19190.1); similar to light repressible receptor protein kinase [Arabidopsis thaliana] (TAIR:AT4G29990.1); similar to leucine-rich repeat protein kinase. putative [Arabidopsis thaliana] (TAIR:AT2G19210.1)                                                                                                                                                                                                                                                                                                                                                                                                                    |
| AT2G19310 |                       | similar to HSP18.2 (HEAT SHOCK PROTEIN 18.2) [Arabidopsis thaliana] (TAIR:AT5G59720.1);                                                                                                                                                                                                                                                                                                                                                                                                                                                                                                                                                                                                                                                                                      |
| AT2G20180 | PIL5                  | PIL5 (PHYTOCHROME INTERACTING FACTOR 3-LIKE 5); transcription factor; similar to transcription regulator [Arabidopsis thaliana] (TAIR:AT4G28811.1);                                                                                                                                                                                                                                                                                                                                                                                                                                                                                                                                                                                                                          |
| AT2G19210 |                       | leucine-rich repeat protein kinase. putative; similar to FRK1 (FLG22-INDUCED RECEPTOR-LIKE KINASE 1). kinase [Arabidopsis thaliana] (TAIR:AT2G19190.1); similar to light repressible receptor protein kinase [Arabidopsis thaliana] (TAIR:AT4G29990.1); similar to leucine-rich repeat protein kinase. putative [Arabidopsis thaliana] (TAIR:AT2G19230.1);                                                                                                                                                                                                                                                                                                                                                                                                                   |
| AT2G18915 | LKP2                  | encodes a member of F-box proteins that includes two other proteins in Arabidopsis (ZTL and FKF1). These proteins contain a unique structure containing a PAS domain at their N-terminus. an F-box motif. and 6 kelch repeats at their C-terminus. Overexpression results in arrhythmic phenotypes for a number of circadian clock outputs in both constant light and constant darkness. long hypocotyls under multiple fluences of both red and blue light. and a loss of photoperiodic control of flowering time. Although this the expression of this gene itself is not regulated by circadian clock. it physically interacts with Dof transcription factors that are transcriptionally regulated by circadian rhythm. LKP2 interacts with Di19. CO/COL family proteins. |
| AT2G17840 | ERD7                  | Identified as drought-inducible gene by differential hybridization. Upregulated by high light. drought. cold and salt stress determined by microarray analysis.                                                                                                                                                                                                                                                                                                                                                                                                                                                                                                                                                                                                              |
| AT2G19540 |                       | transducin family protein / WD-40 repeat family protein; similar to MSI2 (NUCLEOSOME/CHROMATIN ASSEMBLY FACTOR GROUP C 2) [Arabidopsis thaliana] (TAIR:AT2G16780.1)                                                                                                                                                                                                                                                                                                                                                                                                                                                                                                                                                                                                          |
| AT2G18760 | CHR8                  | CHR8 (chromatin remodeling 8); ATP binding / DNA binding / helicase; similar to CHR24 (chromatin remodeling 24). ATP binding / DNA binding / helicase [Arabidopsis thaliana] (TAIR:AT5G63950.1)                                                                                                                                                                                                                                                                                                                                                                                                                                                                                                                                                                              |
| AT2G17560 | HMGB4                 | Encodes a protein belonging to the subgroup of HMGB (high mobility group B) proteins that have a distinctive DNA-binding motif. the HMG-box domain. The motif confers non-sequence specific interaction with linear DNA and structure-specific binding to distorted DNA sites. The HMGB proteins are involved in the assembly of nucleoprotein complexes. Can be phosphorylated by CK2alpha.                                                                                                                                                                                                                                                                                                                                                                                 |
| AT2G16390 | DRD1                  | Putative chromatin remodeling protein. member of a plant-specific subfamily of SWI2/SNF2-like proteins. Mutations nearly eliminate non-CpG methylation at a target promoter but do not affect rDNA or centromere methylation. Cooperates with PolIVb to facilitate RNA-directed de novo methylation and silencing of homologous DNA. Endogenous targets include intergenic regions near retrotransposon LTRs or short RNA encoding sequences that might epigenetically regulate adjacent genes. May be used to establish a basal yet reversible level of silencing in euchromatin.                                                                                                                                                                                           |
| AT2G19640 |                       | SET domain-containing protein; Identical to Histone-lysine N-methyltransferase ASHR2 (EC 2.1.1.43) (ASH1-related protein 2) (Protein SET DOMAIN GROUP 39) (ASHR2) [Arabidopsis Thaliana] (GB:Q9ZUM9;GB:Q84WB9;GB:Q94CD2); similar to unknown protein [Arabidopsis thaliana] (TAIR:AT5G06620.1)                                                                                                                                                                                                                                                                                                                                                                                                                                                                               |
| AT2G13570 |                       | CCAAT-box binding transcription factor. putative; Identical to Nuclear transcription factor Y subunit B-7 (AtNF-YB-7) (NFYB7) [Arabidopsis Thaliana] (GB:Q9SIT9); similar to CCAAT-box binding transcription factor subunit B (NF-YB) (HAP3 ) (AHAP3) family [Arabidopsis thaliana] (TAIR:AT4G14540.1)                                                                                                                                                                                                                                                                                                                                                                                                                                                                       |
| AT2G18050 | HIS1-3                | encodes a structurally divergent linker histone whose gene expression is induced by dehydration and ABA.                                                                                                                                                                                                                                                                                                                                                                                                                                                                                                                                                                                                                                                                     |
