# Supplementary material for: PHYTOCHROME B and HISTONE DEACETYLASE 6 Control Light-Induced Chromatin Compaction in Arabidopsis thaliana
Source: PLOS journal article supplement (doi:10.1371/journal.pgen.1000638), 2009-09-03
Supplement: S10 (10.1371/journal.pgen.1000638.s010) [file journal.pgen.1000638.s010]

**Table S6**

| AGI code  | Associated gene model | Description                                                                                                                                                                                                                                                                                                                                        |
|-----------|-----------------------|----------------------------------------------------------------------------------------------------------------------------------------------------------------------------------------------------------------------------------------------------------------------------------------------------------------------------------------------------|
| AT5G63310 | NDPK2                 | Maintains intracellular dNTP levels except ATP. Plays a role in response to oxidative stress and UV. Involved in phytochrome-mediated light signaling. Participates in auxin-regulated processes. partly through the modulation of auxin transport. H-bonding with His-197 inside the nucleotide-binding pocket is critical for NDPK2 functioning. |
| AT5G63570 | GSA1                  | Encodes a protein with homology to glutamate-1-semialdehyde 2.1-aminomutase catalyzing the conversion of glutamate-1-semialdehyde (GSA) into 5-amino levulinate. The expression of this gene was demonstrated to be light-induced.                                                                                                                 |
| AT5G63870 | PP7                   | Encodes a nuclear localized serine/threonine phosphatase that appears to be regulated by redox activity and is a positive regulator of cryptochrome mediated blue light signalling.                                                                                                                                                                |
| AT5G64330 | NPH3                  | Involved in blue light response signaling pathway; interacts with the blue light photoreceptor NPH1. Null mutations abolish phototropic responses of etiolated seedlings to low fluence blue light. Protein contains multiple protein-protein interaction domains.                                                                                 |
| AT5G64740 | CESA6                 | Encodes a cellulase synthase. Mutants are defective in hypocotyl elongation dark-grown plants. Normal hypocotyl elongation is restored in plants grown in white, blue or red light.                                                                                                                                                                |
| AT5G66560 |                       | phototropic-responsive NPH3 family protein; similar to phototropic-responsive NPH3 family protein [Arabidopsis thaliana] (TAIR:AT3G50840.1)                                                                                                                                                                                                        |
| AT5G66570 | PSBO-1                | Encodes a protein which is an extrinsic subunit of photosystem II and which has been proposed to play a central role in stabilization of the catalytic manganese cluster. In <i>Arabidopsis thaliana</i> the PsbO proteins are encoded by two genes: <i>psbO1</i> and <i>psbO2</i> . PsbO1 is the major isoform in the wild-type.                  |
| AT5G67030 | ABA1                  | Encodes a single copy zeaxanthin epoxidase gene that functions in first step of the biosynthesis of the abiotic stress hormone abscisic acid (ABA). Mutants in this gene are unable to express female sterility in response to beta-aminobutyric acid, as wild type plants do.                                                                     |
| AT5G67385 |                       | signal transducer; similar to phototropic-responsive protein. putative [Arabidopsis thaliana] (TAIR:AT3G49970.1)                                                                                                                                                                                                                                   |
| AT5G63110 | HDA6                  | RPD3-like histone deacetylase. HDA6 mutations specifically increase the expression of auxin-responsive transgenes, suggesting a role in transgene silencing                                                                                                                                                                                        |
| AT5G63470 | MLE2.10               | CCAAT-box binding transcription factor Hap5a. putative; Identical to Nuclear transcription factor Y subunit C-4 (AtNF-YC-4) (NFYC4) [Arabidopsis Thaliana] (GB:Q9FMV5); similar to HAP5A (Heme activator protein (yeast) homolog 5A). DNA binding / transcription factor [Arabidopsis thaliana] (TAIR:AT3G48590.1)                                 |
| AT5G63860 | UVR8                  | UV-B-specific signaling component that orchestrates expression of a range of genes with vital UV-protective functions. Located in the nucleus and the cytosol. Associates with chromatin via histones.                                                                                                                                             |
| AT5G63880 | MGI19.8               | SNF7 family protein; similar to SNF7-related [Arabidopsis thaliana] (TAIR:AT5G09260.1);                                                                                                                                                                                                                                                            |
| AT5G63950 | CHR24                 | CHR24 (chromatin remodeling 24); ATP binding / DNA binding / helicase; similar to CHR8 (chromatin remodeling 8). ATP binding / DNA binding / helicase [Arabidopsis thaliana] (TAIR:AT2G18760.1)                                                                                                                                                    |
| AT5G64610 | MUB3.13               | histone acetyltransferase. putative; Identical to Probable MYST-like histone acetyltransferase 1 (EC 2.3.1.48) (HAG4) [Arabidopsis Thaliana] (GB:Q9FLF7); similar to histone acetyltransferase. putative [Arabidopsis thaliana] (TAIR:AT5G09740.1)                                                                                                 |
| AT5G64630 | FAS2                  | Chromatin Assembly Factor-1 (CAF-1) p60 subunit. Involved in organization of the shoot and root apical meristems.                                                                                                                                                                                                                                  |
| AT5G65350 | MNA5.8                | histone H3; Identical to Histone H3-like 5 [Arabidopsis Thaliana] (GB:Q9FKQ3); similar to histone H3 [Arabidopsis thaliana] (TAIR:AT5G10390.1); similar to histone H3 [Arabidopsis thaliana] (TAIR:AT5G65360.1); similar to histone H3 [Arabidopsis thaliana] (TAIR:AT5G10400.1)                                                                   |
| AT5G66750 | DDM1                  | Protein is similar to SWI2/SNF2 chromatin remodeling proteins. Involved in gene silencing and maintenance of DNA methylation and histone methylation.                                                                                                                                                                                              |
| AT5G67580 | ATTRB2                | ATTRB2/TRB2 (TELOMERE REPEAT BINDING FACTOR 2); DNA binding / transcription factor; similar to ATTRB3/TRB3 (TELOMERE REPEAT BINDING FACTOR 1). DNA binding / transcription factor [Arabidopsis thaliana] (TAIR:AT3G49850.1)                                                                                                                        |
